# Supplementary material
Source: PubMed Central journal article supplement (PMC137885)

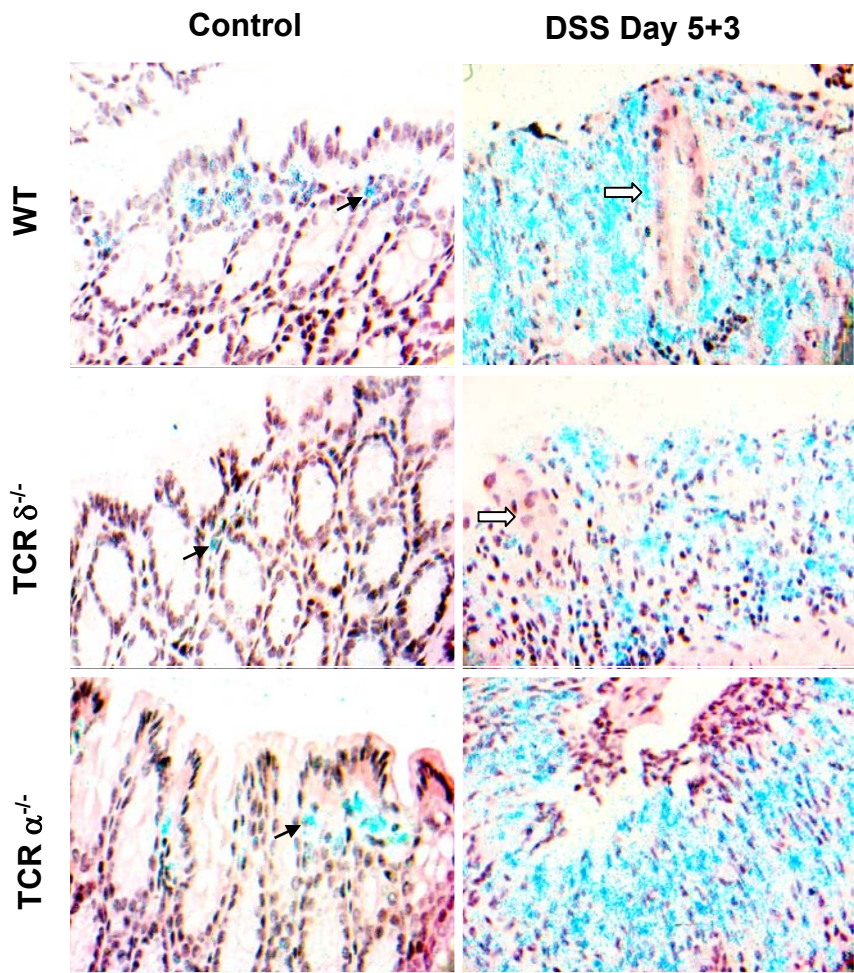

Supplement: pnas_212290499_3.pdf [file pnas_212290499_3.pdf]
